# Supplementary material
Source: publisher figshare collection journal article supplement (https://tandf.figshare.com/ndownloader/files/15577781)
Supplement: Supplementary file 1 [file 15577781]

Glycosylated tris-bipyridine ferrous complexes as molecular mimics of densely packed glycoclusters on cell surfaces: spatial carbohydrate packing of the glycoclusters changes on additions of salts

Naoto Chigira a, Nao Maeda b, Kanako Tachikawa b, Maki Sekiguchi b, Yoshitsugu Amano a, Mayu Inokuchi b, Qintong Li b, and Teruaki Hasegawa b, c, *

*aGraduate School of Life Sciences, Toyo University, 1-1-1 Izumino, Itakura-machi, Ora-gun, Gumma 374-0193, Japan*

*bFaculty of Life Sciences, Toyo University, 1-1-1 Izumino, Itakura-machi, Ora-gun, Gumma 374-0193, Japan*

*cBio-Nano Electronics Research Centre, Toyo University, 2100 Kujirai, Kawagoe, Saitama 350-8585, Japan*

*Correspondence should be addressed to T.H. (t-hasegawa@toyo.jp)

Structures of LeX, GM3, Gg3, and LacCer (Chart S1), a colored version of Fig. 2 (Fig. S1), a colored version of Fig. 5 (Fig. S2), and 1H/13C NMR spectra of the newly synthesized compounds.


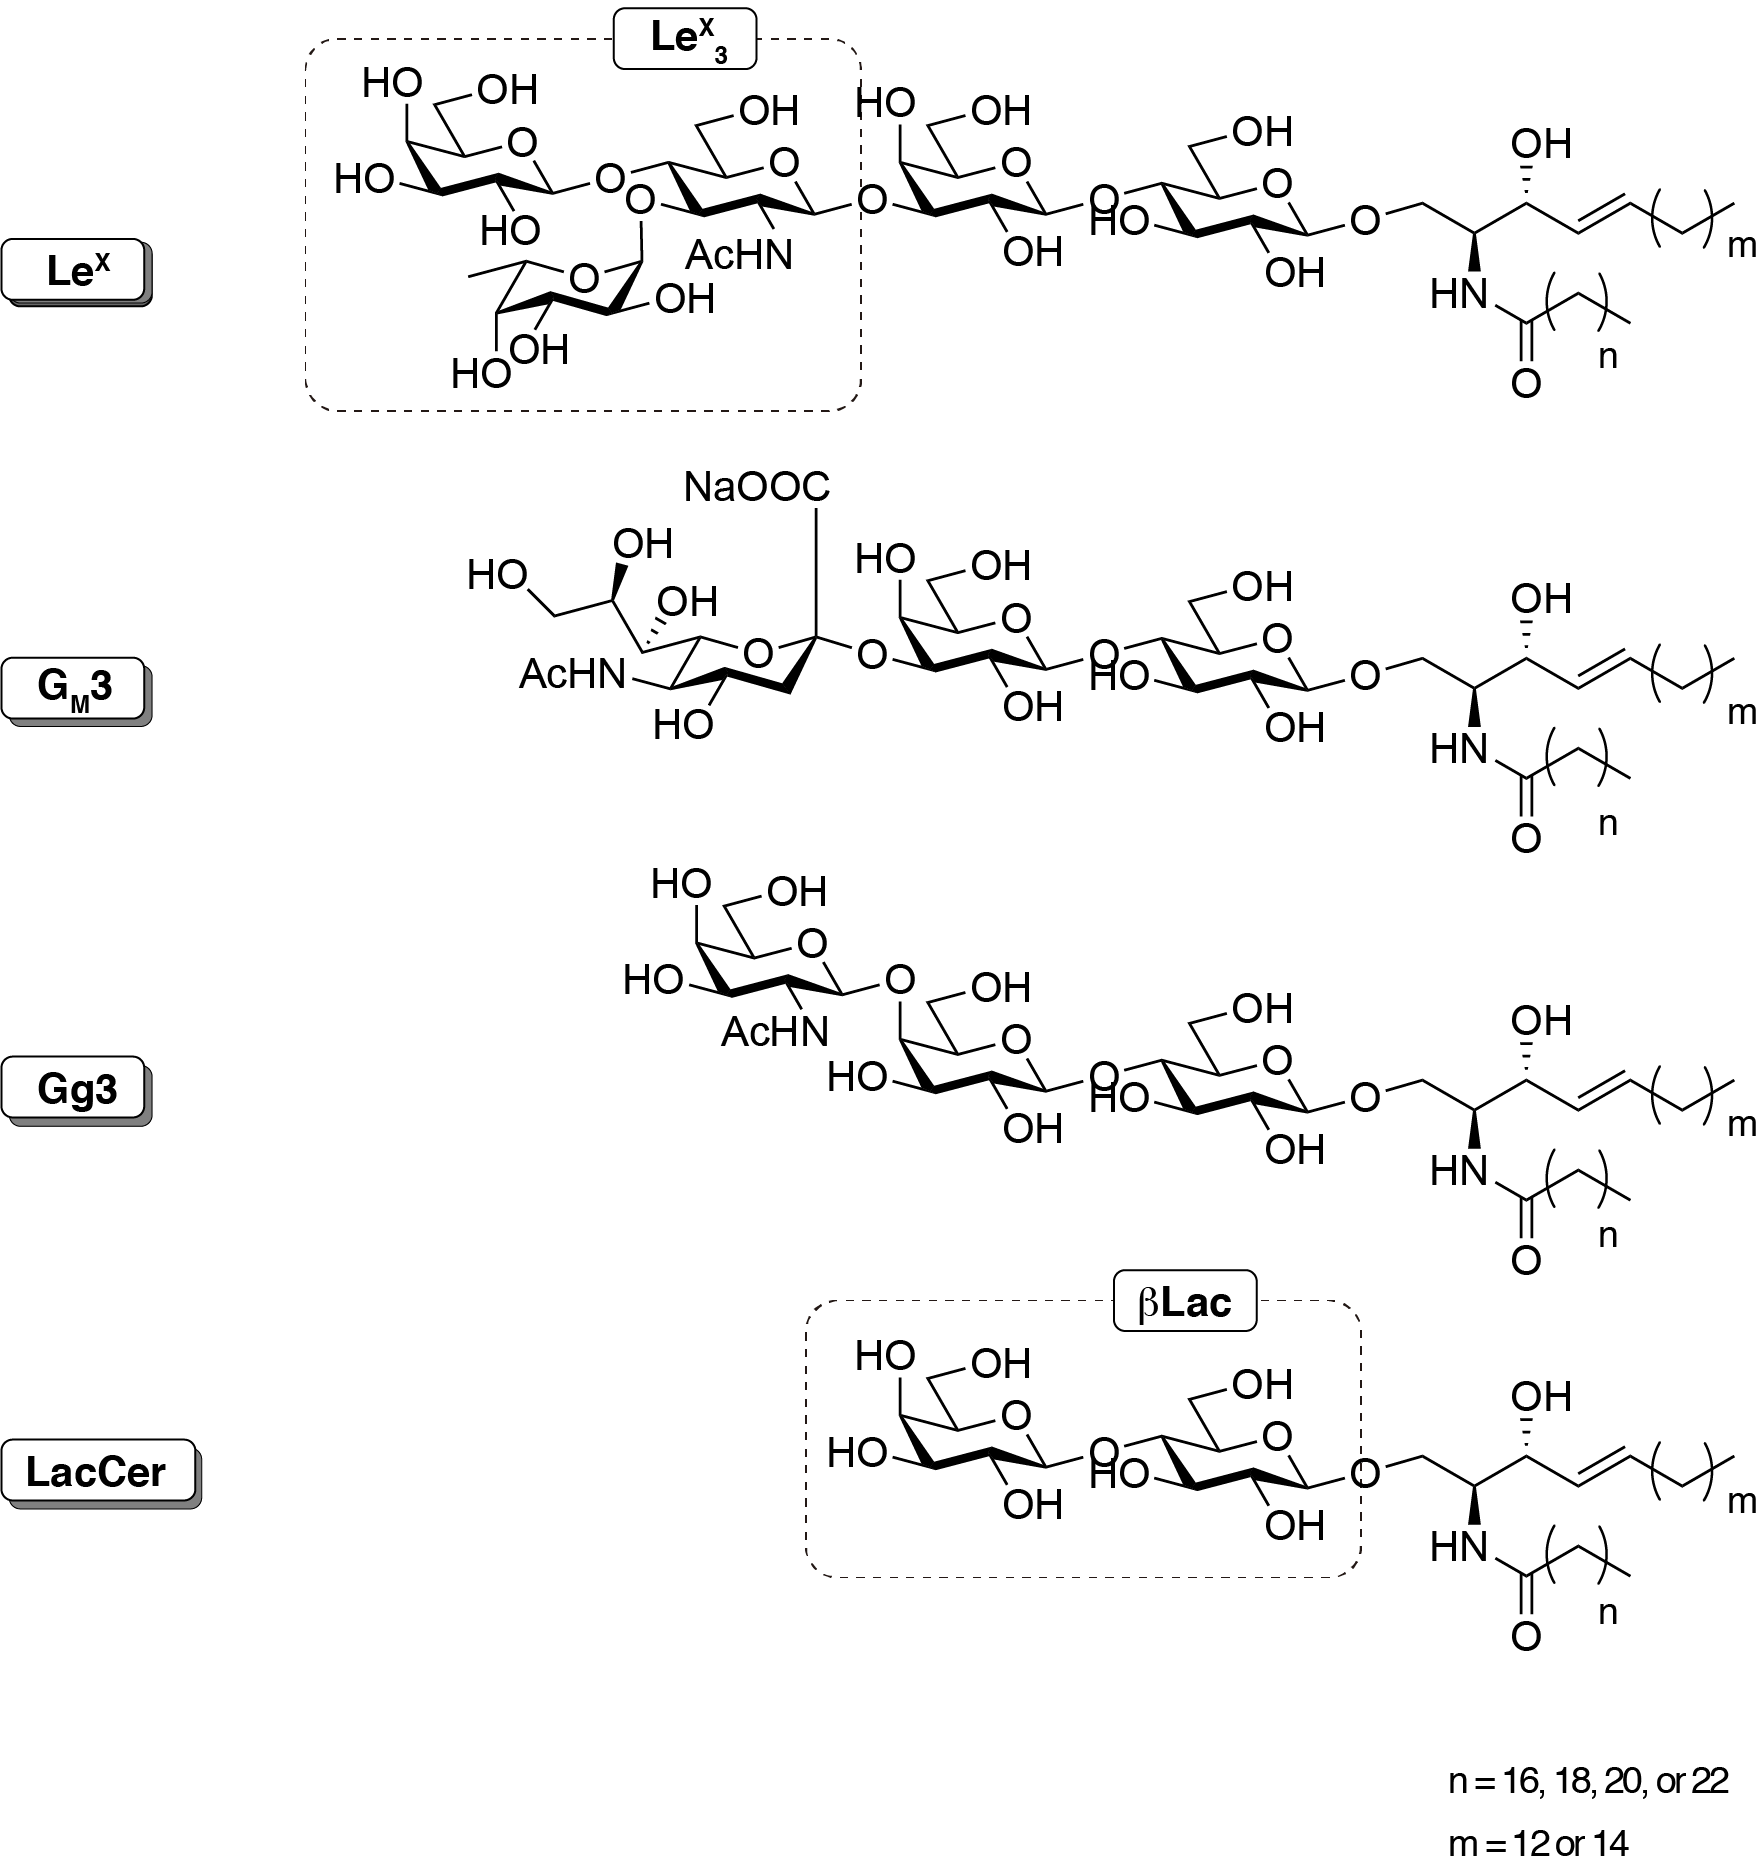


**Chart S1.** Structures of LeX, GM3, Gg3, and LacCer.


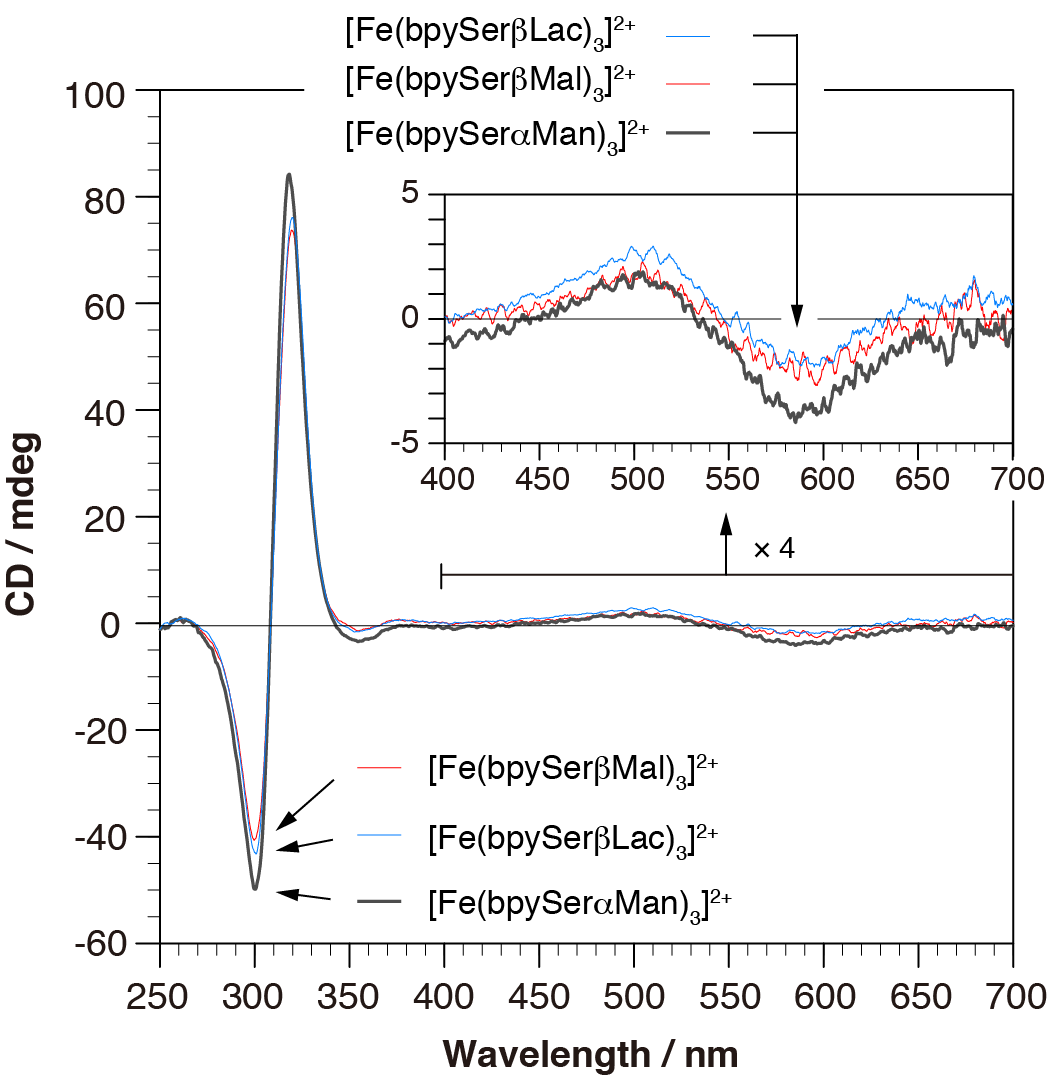


**Fig. S1.** Colored version of Fig. 2.


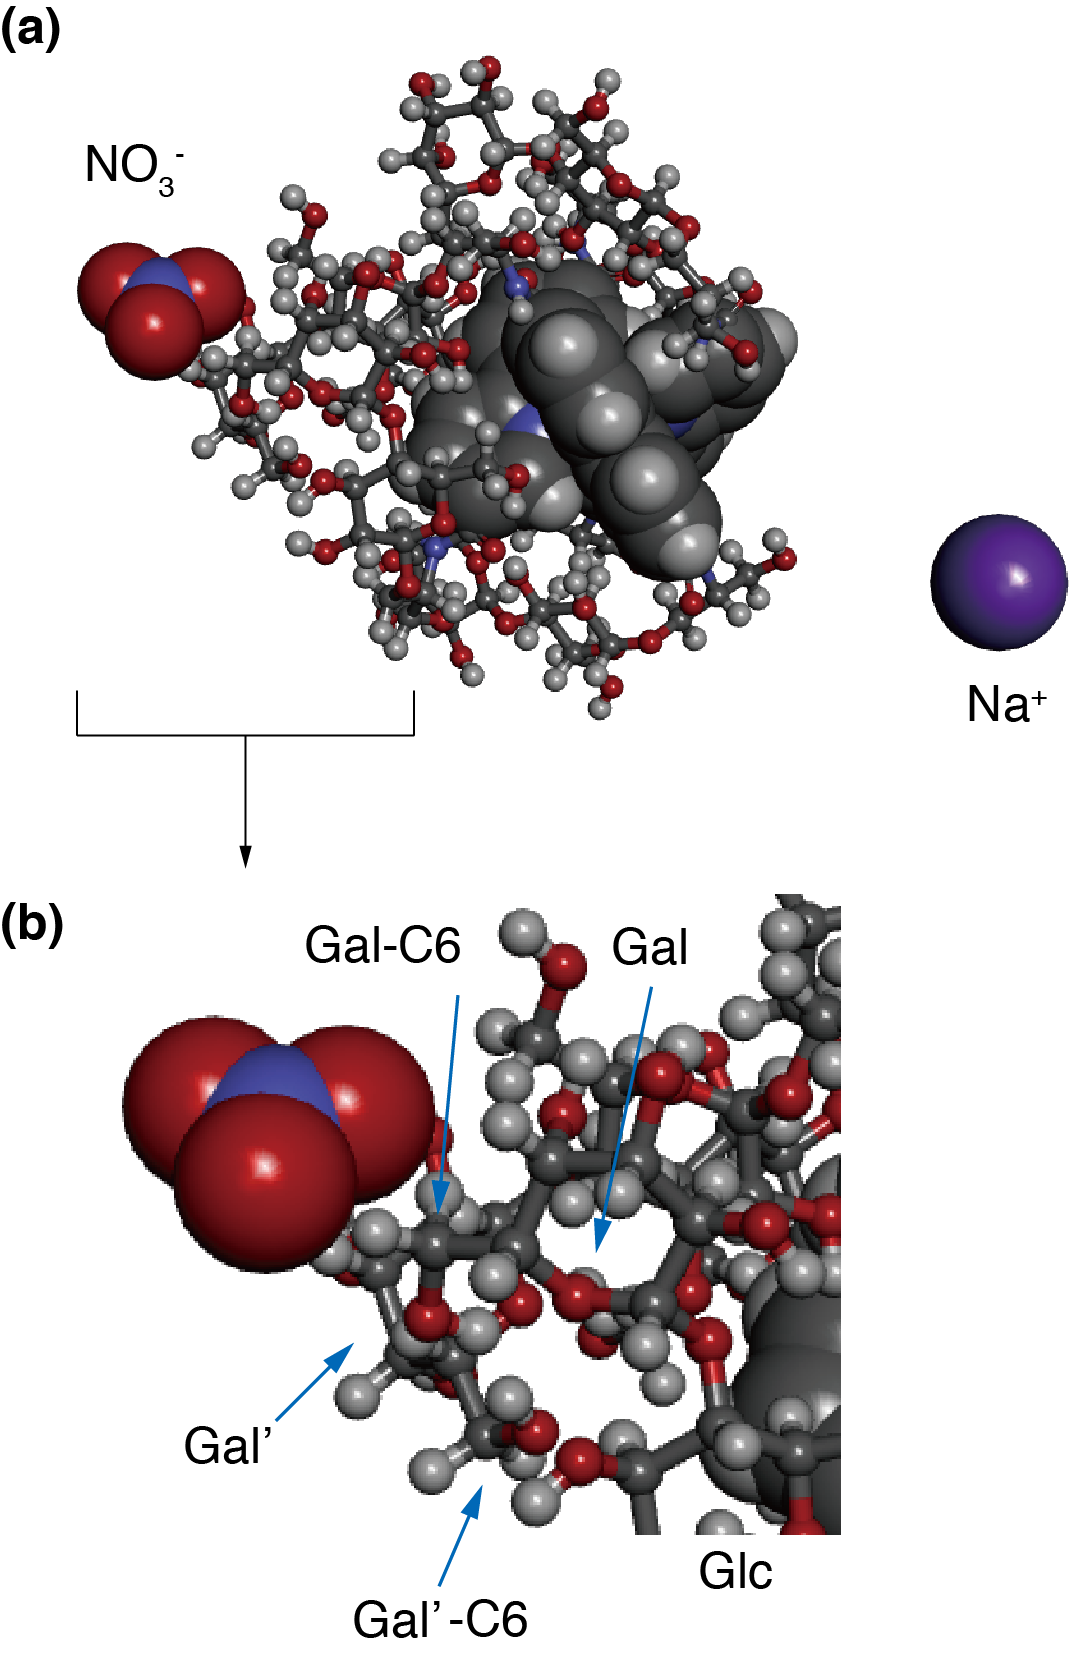


**Fig. S2.** Colored version of Fig. 5.

**1H/13C NMR spectra of bpySerMeLacAc**

**
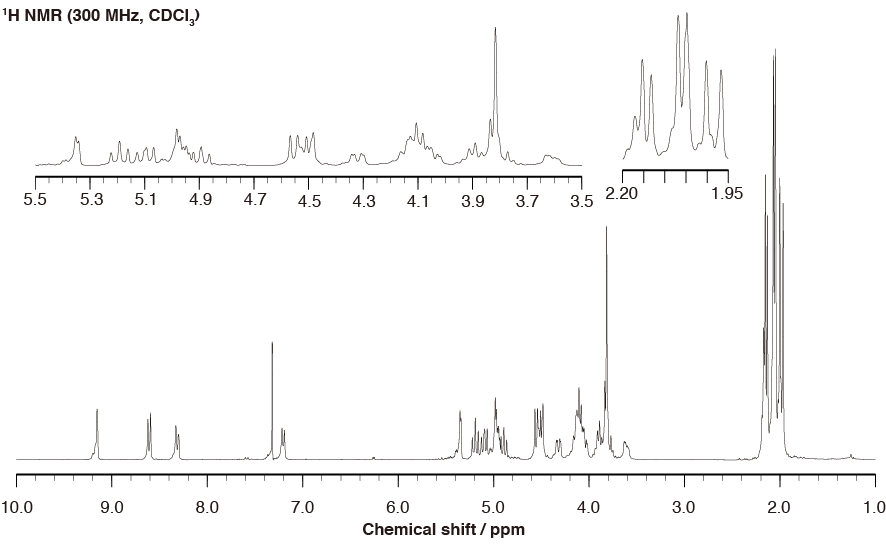
**

**
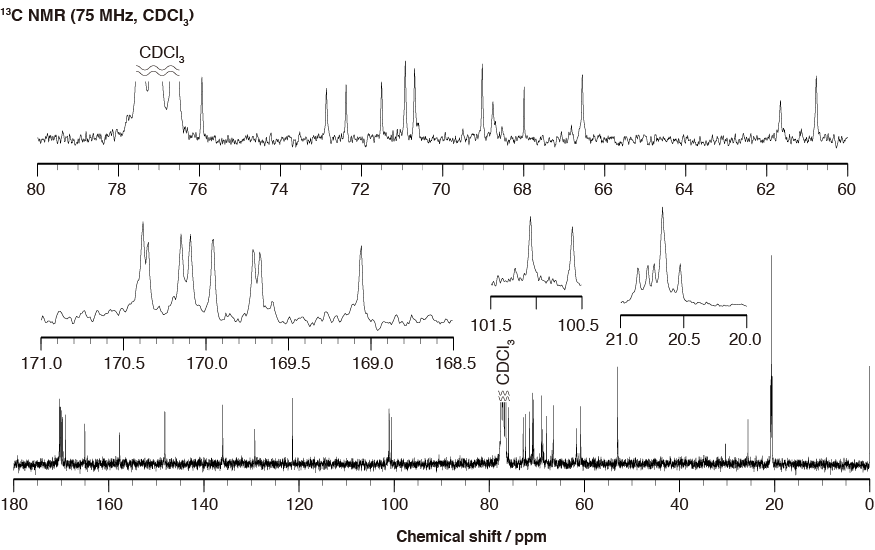
**

**1H/13C NMR spectra of bpySerMeMalAc**

**
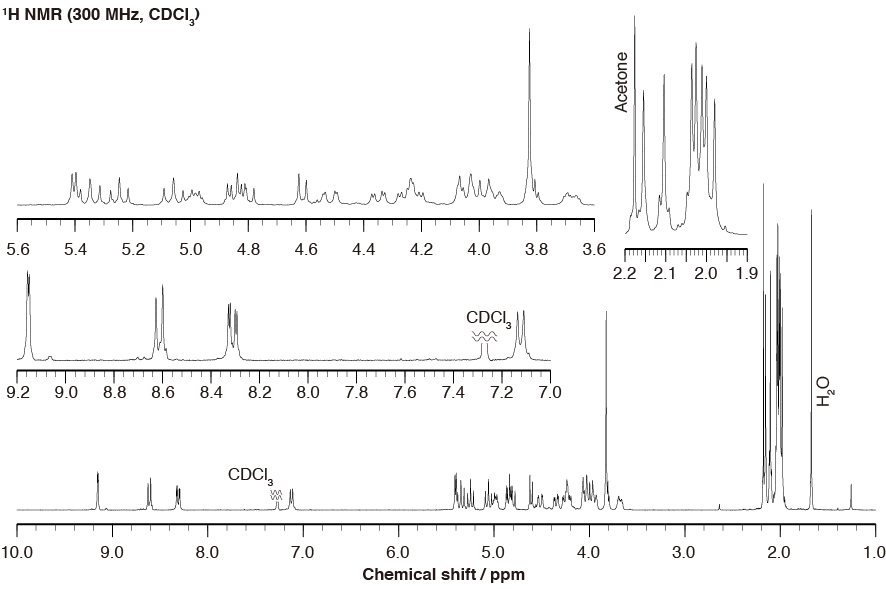
**

**
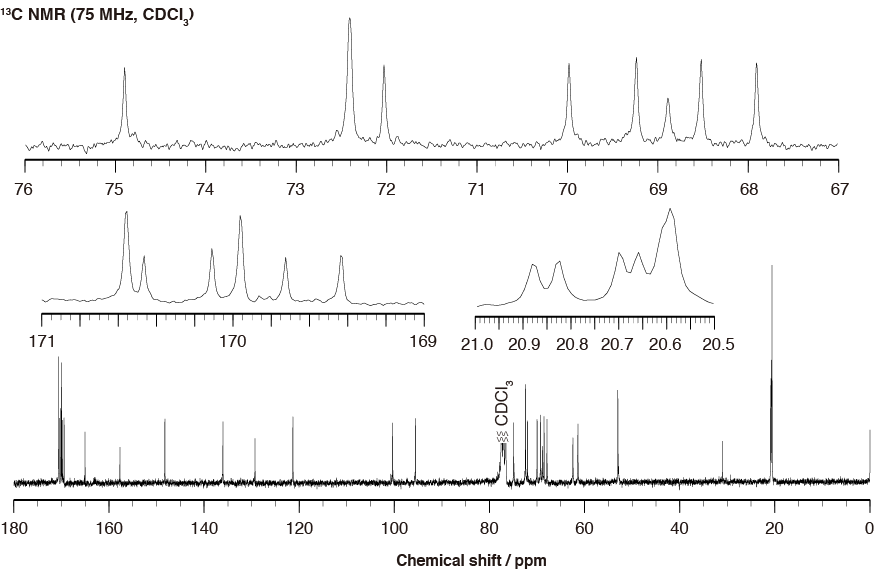
**

**1H/13C NMR spectra of bpySerMeManAc**

**
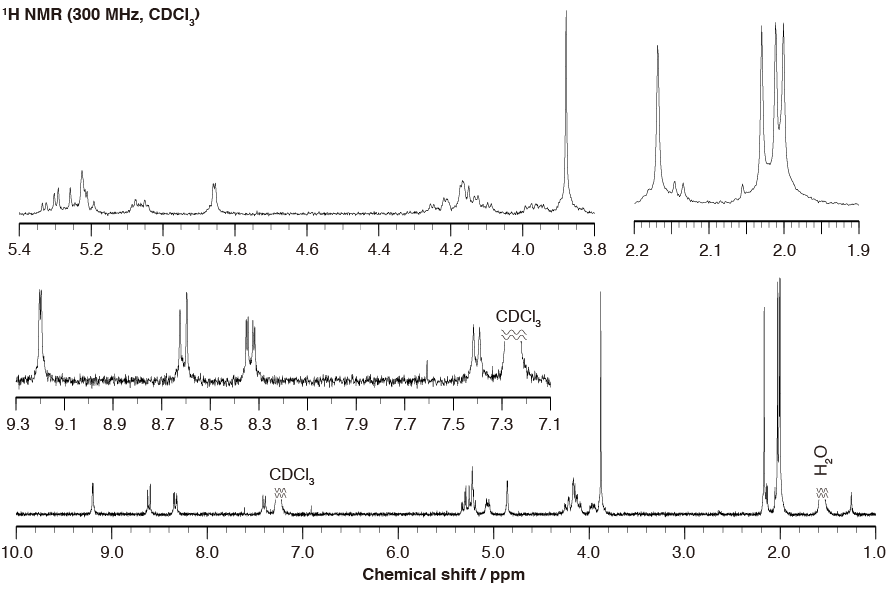
**

**
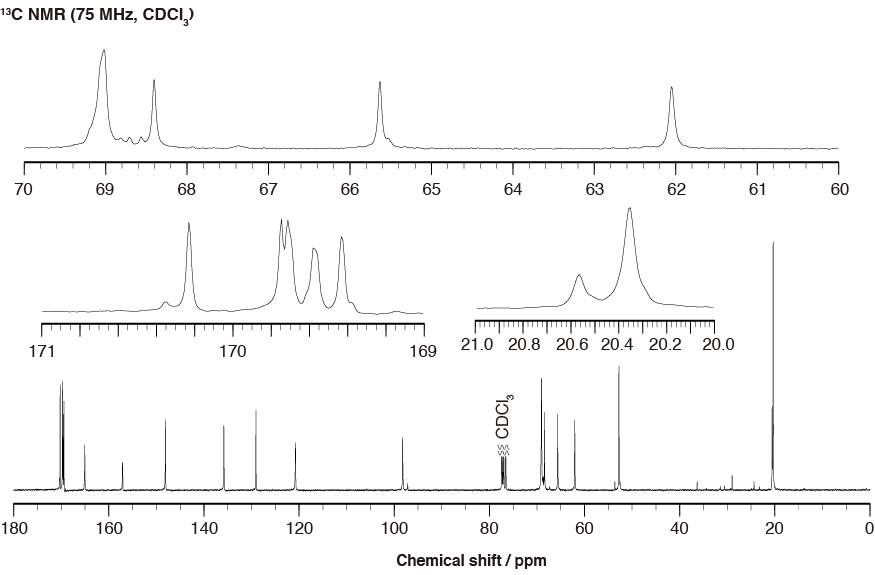
**

**1H/13C NMR spectra of bpySerLac**

**
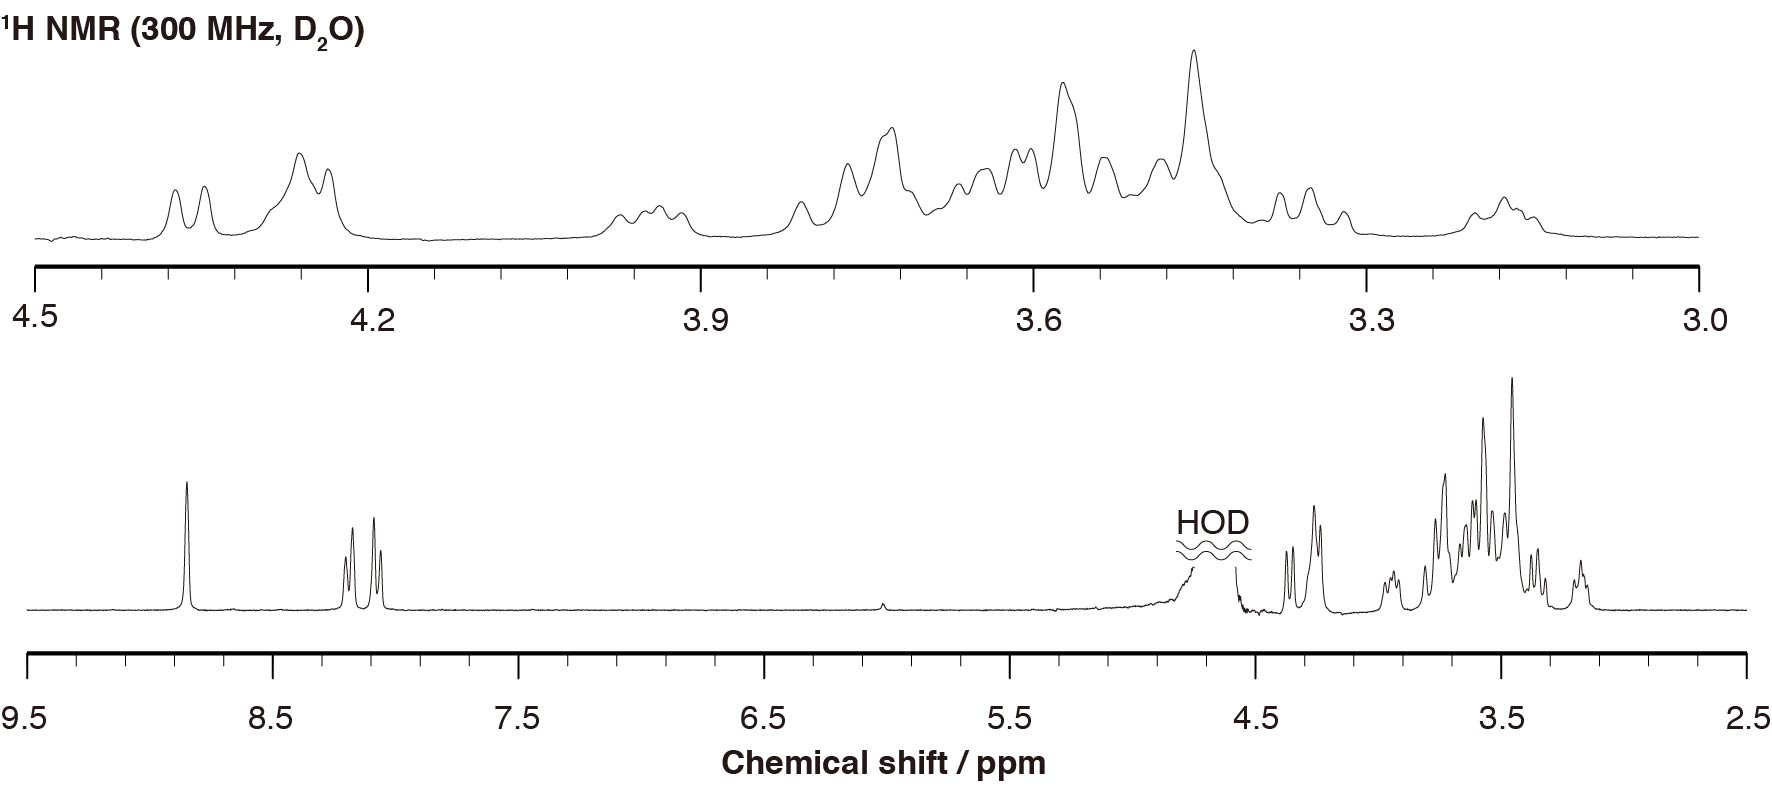
**

**
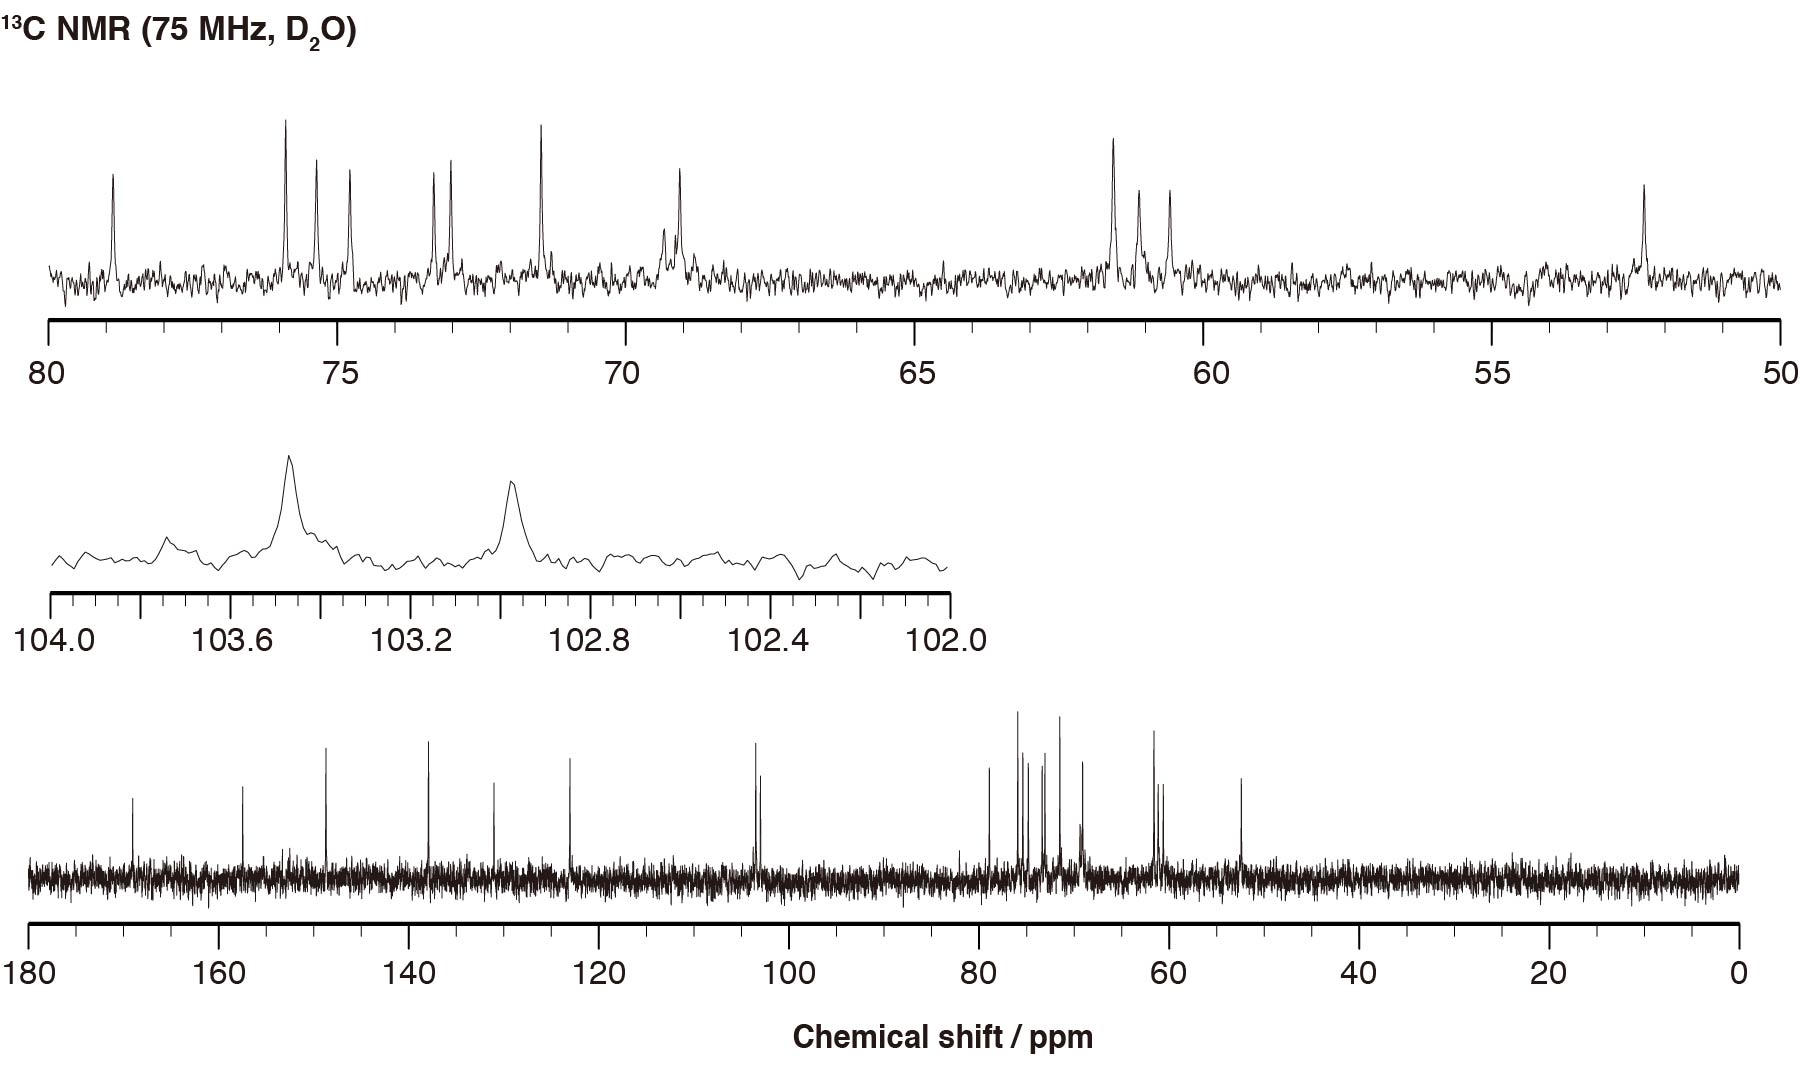
**

**1H/13C NMR spectra of bpySerMal**

**
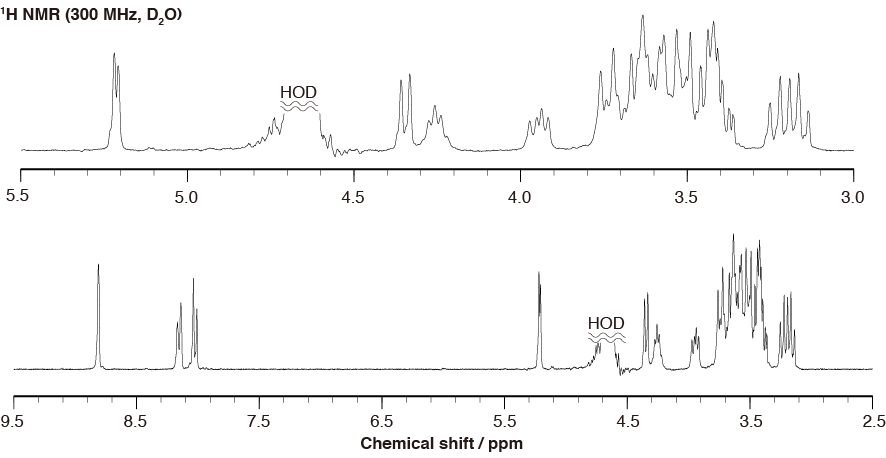
**

**
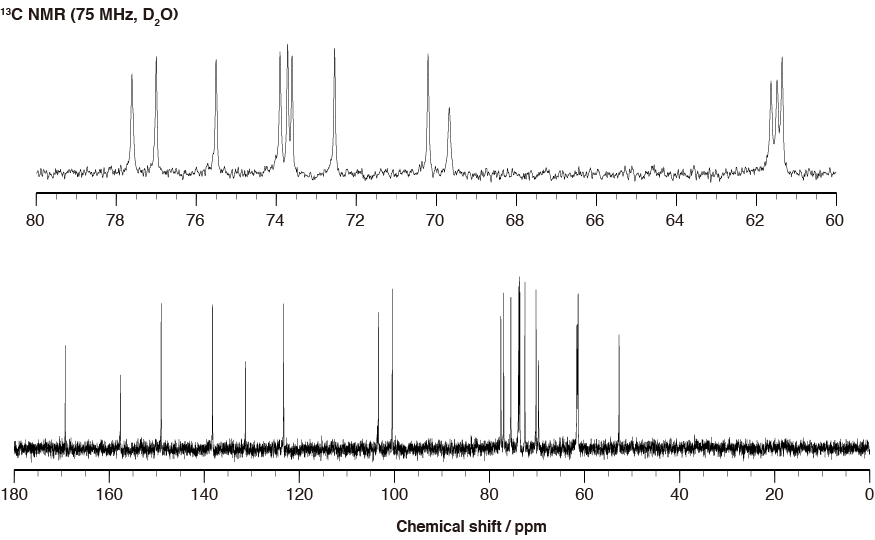
**

**1H/13C NMR spectra of bpySerMan**

**
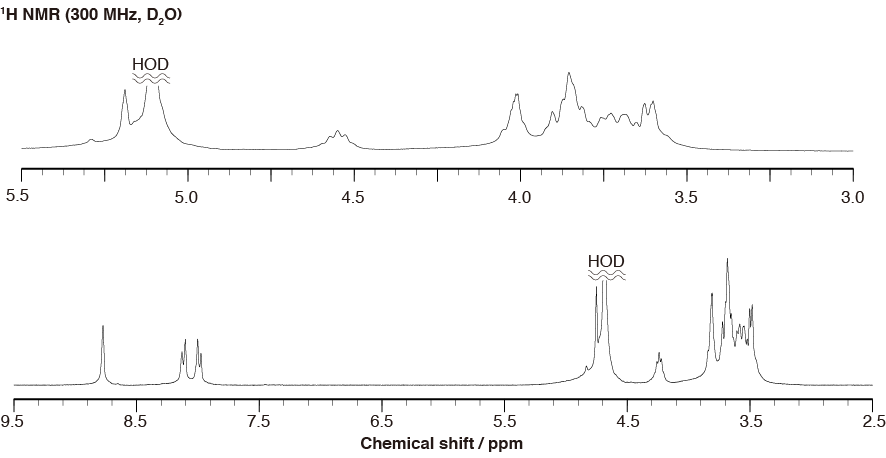
**

**
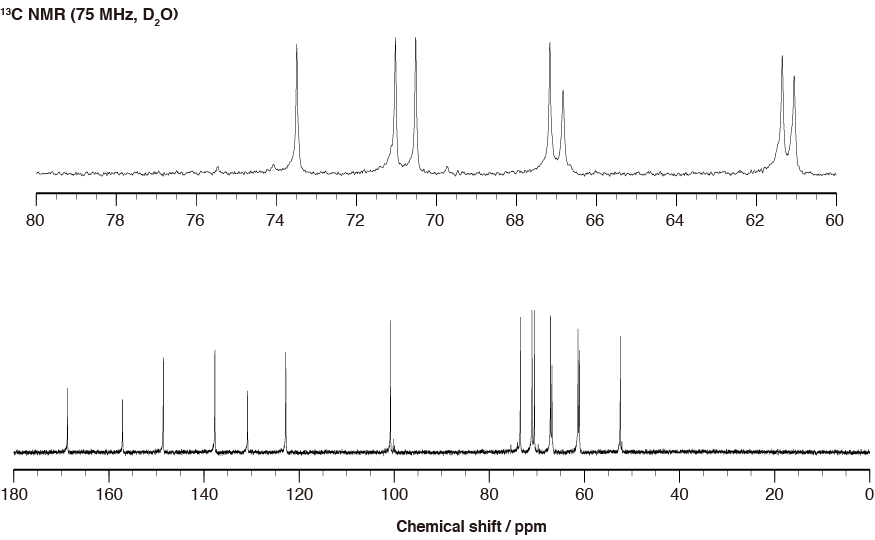
**
